# Supplementary material for: Plasma Metabolomics Profile of “Insulin Sensitive” Male Hypogonadism after Testosterone Replacement Therapy
Source: MDPI journal article supplement (doi:10.3390/ijms23031916), 2022-02-08
Supplement: s1 [file s1]

**Table S1.** List of metabolites selected to evaluate the effect of testosterone therapy and their percentage increase or decrease before and after treatment. The values are reported as percentual difference compared to control ( not included in table). *Green*, increased molecules; *red* decreased molecules.

| Molecule                                   | M.W.     | Hypog. (%) | Post testost. (%) |
|--------------------------------------------|----------|------------|-------------------|
| D-Glucose 6-Phosphate (260,14)             | 260,14   | 100        | 105               |
| beta-D-Fructose 1,6-bisphosphate (340.114) | 340.114  | 350        | 300               |
| D-Glyceraldehyde 3-phosphate (170,06)      | 170,06   | 5          | 10                |
| Phosphoenolpyruvate (168,04)               | 168,04   | -1         | 20                |
| Lactate (90,08)                            | 90,08    | 10         | 280               |
| D-Glucono-1,5-lactone (178,14)             | 178,14   | 70         | 30                |
| D-Ribulose 5-phosphate (230,11)            | 230,11   | 60         | 15                |
| D-Erythrose 4-phosphate (200,084)          | 200,084  | -20        | -98,9             |
| 6-P-D-Gluconate (276,135)                  | 276,135  | 90         | 10                |
| Sedoheptulose 1,7-bisphosphate (370.14)    | 370.14   | 100        | -75               |
| NADH (663,43)                              | 663,43   | 280        | 80                |
| NAD (663,43)                               | 663,43   | 10         | -20               |
| Glutathione disulfide (610.6)              | 610.6    | 98         | -90               |
| Glycerol-3-Phosphate (172,074)             | 172,074  | -40        | 20                |
| Dyhydroxyacetone-3P (170,06)               | 170,06   | 5          | -30               |
| Mevalonate (148,16)                        | 148,16   | 290        | 700               |
| Acetyl-CoA (809,57)                        | 809,57   | -48        | 20                |
| Acetyl-carnitine (203,236)                 | 203,236  | -20        | -90               |
| Citrate (192,124)                          | 192,124  | -99,6      | -99,55            |
| Oxaloacetate (132,07)                      | 132,07   | -18        | -1                |
| Malate (134,0874)                          | 134,0874 | 300        | 25                |
| Succinate (118,09)                         | 118,09   | 10         | -5                |
| 2-oxoglutarato (146,11)                    | 146,11   | 4          | 1                 |
| Oxalosuccinate (190.11)                    | 190.11   | 5          | -15               |
| cis-Aconitate (174,108)                    | 174,108  | -20        | -100              |
| Glutamate (147,13)                         | 147,13   | -48        | 90                |
| Glutamine (146,14)                         | 146,14   | -5         | 2                 |
| AMP (347,2212)                             | 347,2212 | -40        | -20               |
| ATP (507,18)                               | 507,18   | -1         | -60               |
| Aspartate (133,11)                         | 133,11   | -60        | -55               |
| Leucine/isoleucine (131,17)                | 131,17   | -15        | -47               |
| Valine (117,15)                            | 117,15   | -15        | -40               |
| Tyrosine (181,19)                          | 181,19   | -1         | -48               |
| Phenylalanine (165,19)                     | 165,19   | -5         | -48               |
| Cysteine (121,16)                          | 121,16   | 200        | -85               |
| Tryptophan (204,23)                        | 204,23   | -2         | -50               |
| Methionine (149,21)                        | 149,21   | -1         | -25               |

|                      |          |     |     |
|----------------------|----------|-----|-----|
| Alanine (89,09)      | 89,09    | 280 | -55 |
| Serine (105,09)      | 105,09   | 299 | 60  |
| Threonine (119,1192) | 119,1192 | -5  | 50  |
| Asparagine (132,12)  | 132,12   | -97 | -90 |
| L-Arginine (174,2)   | 174,2    | 60  | 200 |
| Proline (115,13)     | 115,13   | 50  | 47  |
| L-Lysine (146,19)    | 146,19   | 50  | 25  |
| Histidine (155,1546) | 155,1546 | -99 | 110 |
| Uracil (112,09)      | 112,09   | -48 | -40 |
| Carnosine (226,3)    | 226,3    | -55 | -18 |
